# Supplementary material
Source: publisher figshare collection journal article supplement (https://gsapubs.figshare.com/ndownloader/files/25999310)
Supplement: Supplementary file 1 [file 25999310]

## Sheet: Table S3
Supplemental Material for Ocampo-Díaz, Y.Z.E., Torres-Sánchez, S.A., Augustsson, C., Macías, J.L., Sosa-Ceballos, G., Cisneros-Máximo, G., García-Sánchez, L.,
Osorio-Ocampo, S., Avellan, D.R., Omma, J., Ortega-Obregón, C., Solari, L.A., and González-Barba, G., 2020, Provenance of the El Salto Formation (early Oligocene
to early Miocene), southern part of La Reforma caldera, Baja California Sur, Mexico, in Martens, U.C., and Molina Garza, R.S., eds., Southern and Central Mexico:
Basement Framework, Tectonic Evolution, and Provenance of Mesozoic–Cenozoic Basins: GSA Special Paper 546, p. 1–32, https://doi. org/10.1130/2020.2546(11).
	Table S3: MAJOR (WT%) AND TRACE (PPM) ELEMENTAL COMPOSITION OF VOLCANIC ROCKS OF THE EL SALTO FORMATION FROM LA PURISIMA-COMONDÚ FOREARC BASIN DETERMINED AT ACLABS IN VANCOUVER, CANADA.
		IGNEOUS ROCKS
	Sample	Yaq-27-4	Yaq-10-17	Yaq-48	Yaq-55	Yaq-47
		Ignimbrite	Andesitic Lava	Ignimbrite	Ignimbrite	Ash tuff
	Major elements (wt%)
	SiO2	66.92	56.91	77.29	73.7	73.42
	Al2O3	10.35	16.77	12.22	11.96	12.31
	Fe2O3	2.56	5.73	1.29	1.53	1.14
	MgO	2.63	0.48	0.3	0.42	0.08
	CaO	3.59	7.68	0.31	1.74	0.22
	Na2O	1.04	3.21	0.25	0.97	1.47
	K2O	2.69	2.63	3.52	4.04	7.03
	MnO	0.128	0.106	0.035	0.091	0.006
	TiO2	0.477	0.673	0.242	0.23	0.221
	P2O5	0.14	0.3	0.05	0.15	0.08
	LOI	8.36	4.97	4.38	3.91	2.85
	Total	98.885	99.459	99.887	98.741	98.827
	Trace elements (ppm)
	Sc	6	10	4	2	3
	V	53	116	13	27	15
	Cr	90	70	50	50	80
	Co	3	5	< 1	4	< 1
	Ni	5	11	2	3	2
	Zn	41	86	48	27	22
	Ga	12	22	17	12	16
	Rb	101	49	91	83	153
	Sr	94	1254	97	79	51
	Y	23.6	15.6	29.9	15.9	21.1
	Zr	355	120	170	126	122
	Nb	9.4	3.1	10	6.1	6.2
	Ba	600	778	1731	1502	1143
	Hf	8.7	3.1	4.9	3.4	3.7
	Ta	0.93	0.21	0.94	0.74	0.93
	Pb	14	5	11	8	8
	Th	11.6	4.28	14.5	10.1	14.7
	U	3.9	1.28	2.33	3.36	4.3
	Cs	10.4	9.2	3.4	1.4	2.5
	La	33.9	25.4	36.5	29.5	33.7
	Ce	67.6	55.8	70.4	55.3	67.9
	Pr	7.58	6.92	8.1	6.29	7.39
	Nd	27.9	28.6	31.1	21.6	26.6
	Sm	5.38	5.61	6.25	3.77	4.99
	Eu	1.08	1.57	1.27	0.928	0.993
	Gd	4.54	4.15	5.45	3	3.76
	Tb	0.7	0.58	0.87	0.48	0.62
	Dy	3.86	2.93	5.08	2.76	3.84
	Ho	0.76	0.49	0.97	0.55	0.77
	Er	2.12	1.42	2.86	1.67	2.32
	Tm	0.324	0.201	0.429	0.269	0.34
	Yb	2.37	1.35	2.89	1.86	2.27
	Lu	0.376	0.192	0.432	0.305	0.363
	< below detection limit
	­ unmeasured
